# Supplementary material
Source: PubMed Central journal article supplement (PMC5849089)

## Supplementary Tables and Figure

**Table S1 : Multivariable risk factors associated with death in patients with Cryptococcosis**

| <b>Risk Factor</b> | <b>HIV-infected<br/>(n= 2091)<br/>HR (95% CI)</b> | <b>NHNT<br/>(n= 1470)<br/>HR (95% CI)</b> | <b>SOT (multivariable)</b> |
|--------------------|---------------------------------------------------|-------------------------------------------|----------------------------|
| Age (yrs.)         |                                                   |                                           |                            |
| 18-39              | 1                                                 | 1                                         | 1                          |
| 40-49              | -                                                 | -                                         | -                          |
| 50-59              | -                                                 | 1.63 (1.12-2.36)                          | -                          |
| 60-69              | -                                                 | 2.02 (1.40-2.93)                          | -                          |
| >70                | 2.20 (1.01-4.74)                                  | 2.37 (1.66-3.37)                          | -                          |
| Liver Disease      | 1.54 (1.21-1.92)                                  | 2.08 (1.67-2.58)                          | 3.50 (1.55-7.85)           |
| Renal Failure      | -                                                 | 1.56 (1.27-1.92)                          | -                          |
| Diabetes           | 1.42 (1.08-1.86)                                  | 1.27 (1.01-1.49)                          | -                          |
| Lymphoma/Leukemia  | 2.08 (1.36-3.16)                                  | 1.35 (1.10-1.65)                          | -                          |
| CHF*               | 1.76 (1.23-2.53)                                  | 1.42 (1.14-1.76)                          | -                          |
| Lung transplant    | -                                                 | -                                         | 1.87 (0.90-3.91)           |

\*CHF - Congestive heart failure

**Table S2: Diagnosis Codes Used Identify Clinical Syndromes/ Infections**

| <b>Diagnosis</b>               | <b>ICD-9-CM Diagnosis Code</b>                                                                                                                                                                                                                    |
|--------------------------------|---------------------------------------------------------------------------------------------------------------------------------------------------------------------------------------------------------------------------------------------------|
| Cryptococcal disease           | 117.5                                                                                                                                                                                                                                             |
| Cryptococcal meningitis        | 321.0                                                                                                                                                                                                                                             |
| HIV infection                  | 042.0, 044.9                                                                                                                                                                                                                                      |
| Skin and Soft Tissue Infection | 5673.1, 680.0 -680.9, 681.00 – 681.02, 681.10, 681.11, 681.9, 682.0- 682.9, 683, 684, 685.0, 686.0, 686.00, 686.01, 686.09, 686.1, 686.8, 686.9, 675.00- 675.04, 675.10 – 675.14, 675.80 – 675.84, 675.90 – 675.94, 705.83, 727.89, 728.0, 728.86 |
| Lumbar puncture                | 033.1                                                                                                                                                                                                                                             |
| Solid organ transplantation    | 55.69, 50.59, 37.51, 33.50, 33.51, 33.52, 33.6, 52.80, 52.86, 46.97, V420, V427, V421, V426, V4283, V4284                                                                                                                                         |

Supplemental figure : Trends in incidence rates of Cryptococcosis by state

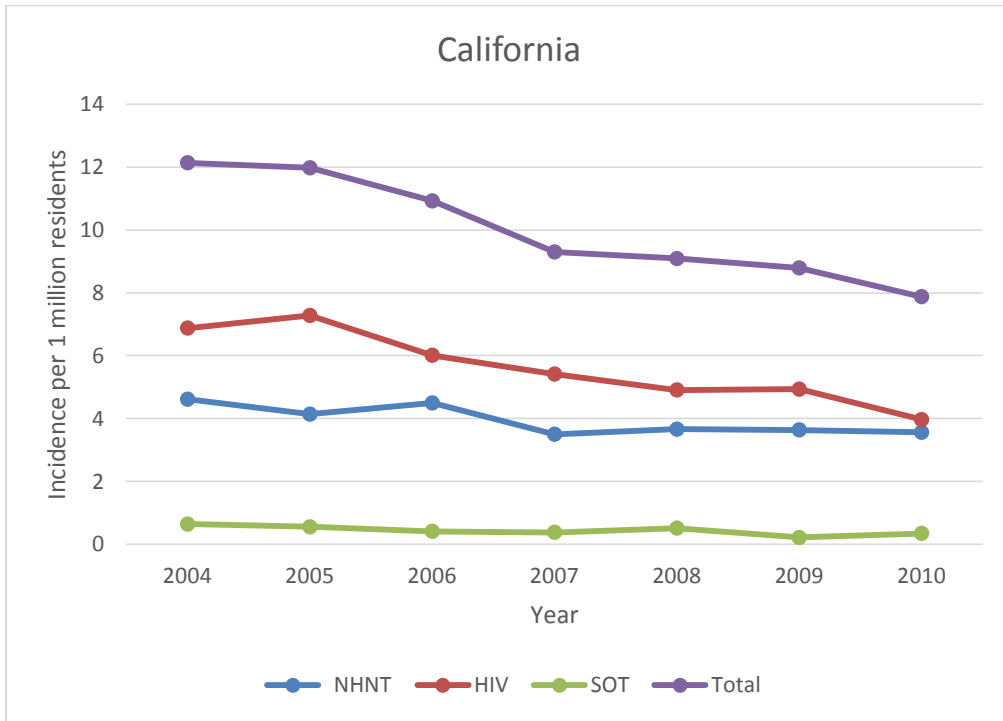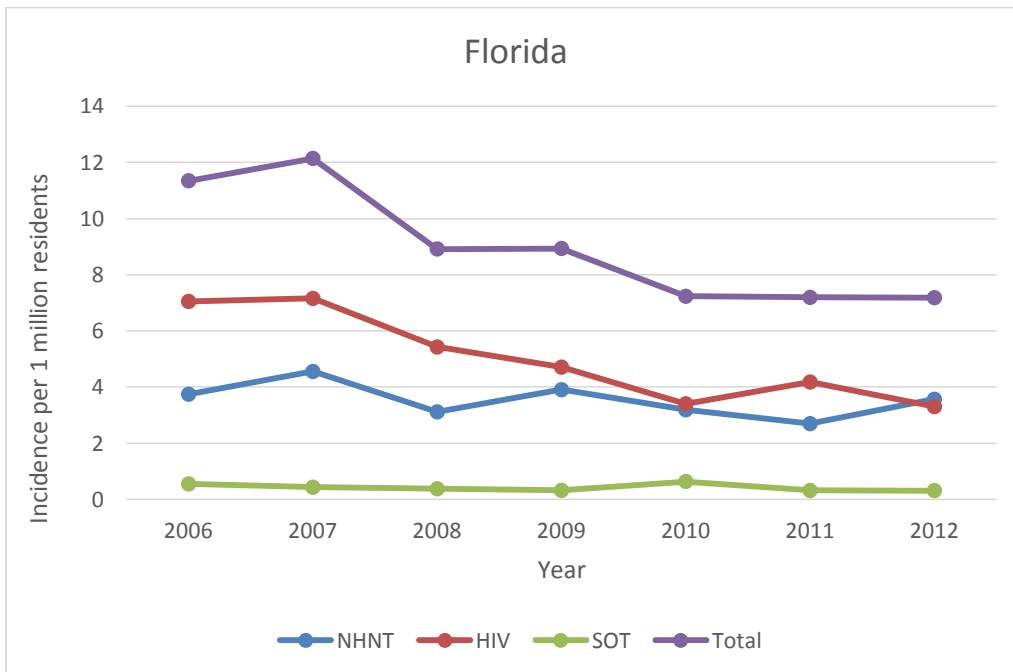

Supplement: cix867_suppl_supplementary_tables_figure.pdf [file cix867_suppl_supplementary_tables_figure.pdf]
